# Supplementary material for: TALEN Mediated Gene Targeting for CF Gene Therapy
Source: Preprints.org preprint supplement (doi:10.20944/preprints201811.0444.v1), 2018-11-19
Supplement: Supplementary file 1 [file supplementary]

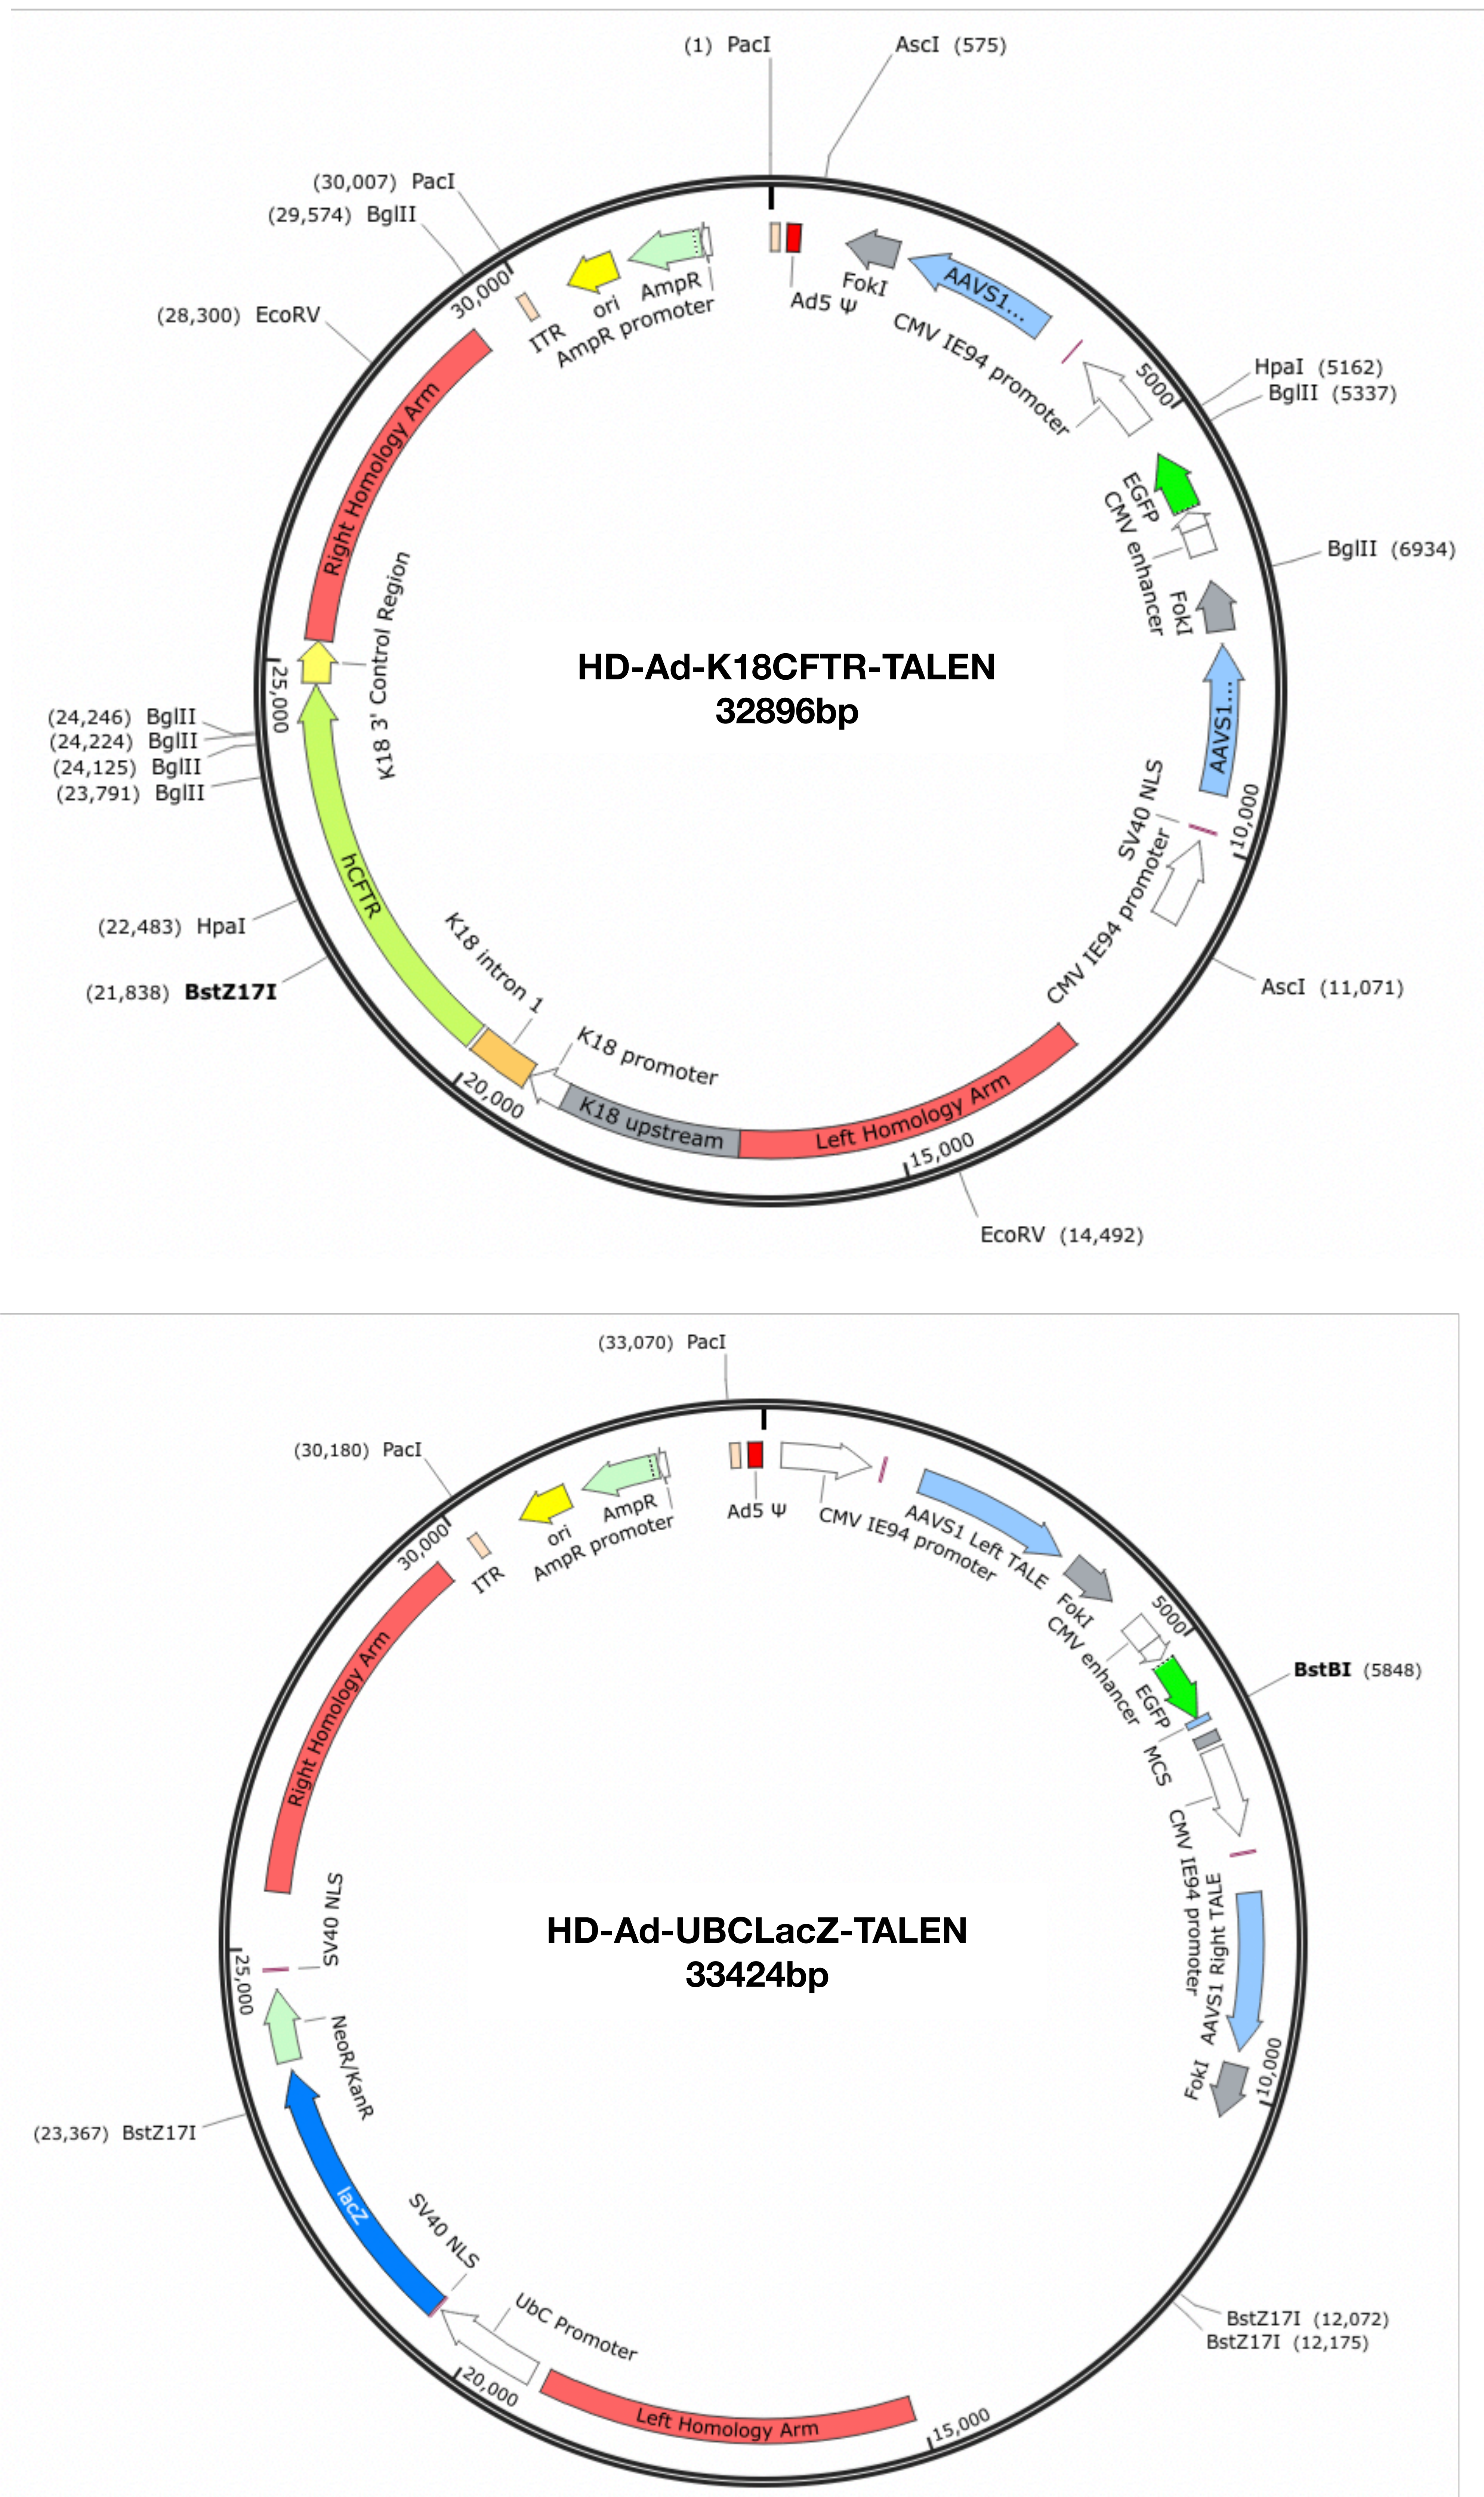

**Supplementary Figure 1.** Vector maps for HD-Ad-K18CFTR-TALEN and HD-Ad-UBCLacZ- TALEN. Restriction enzyme PacI was used to linearize the plasmid DNA for viral vector production.



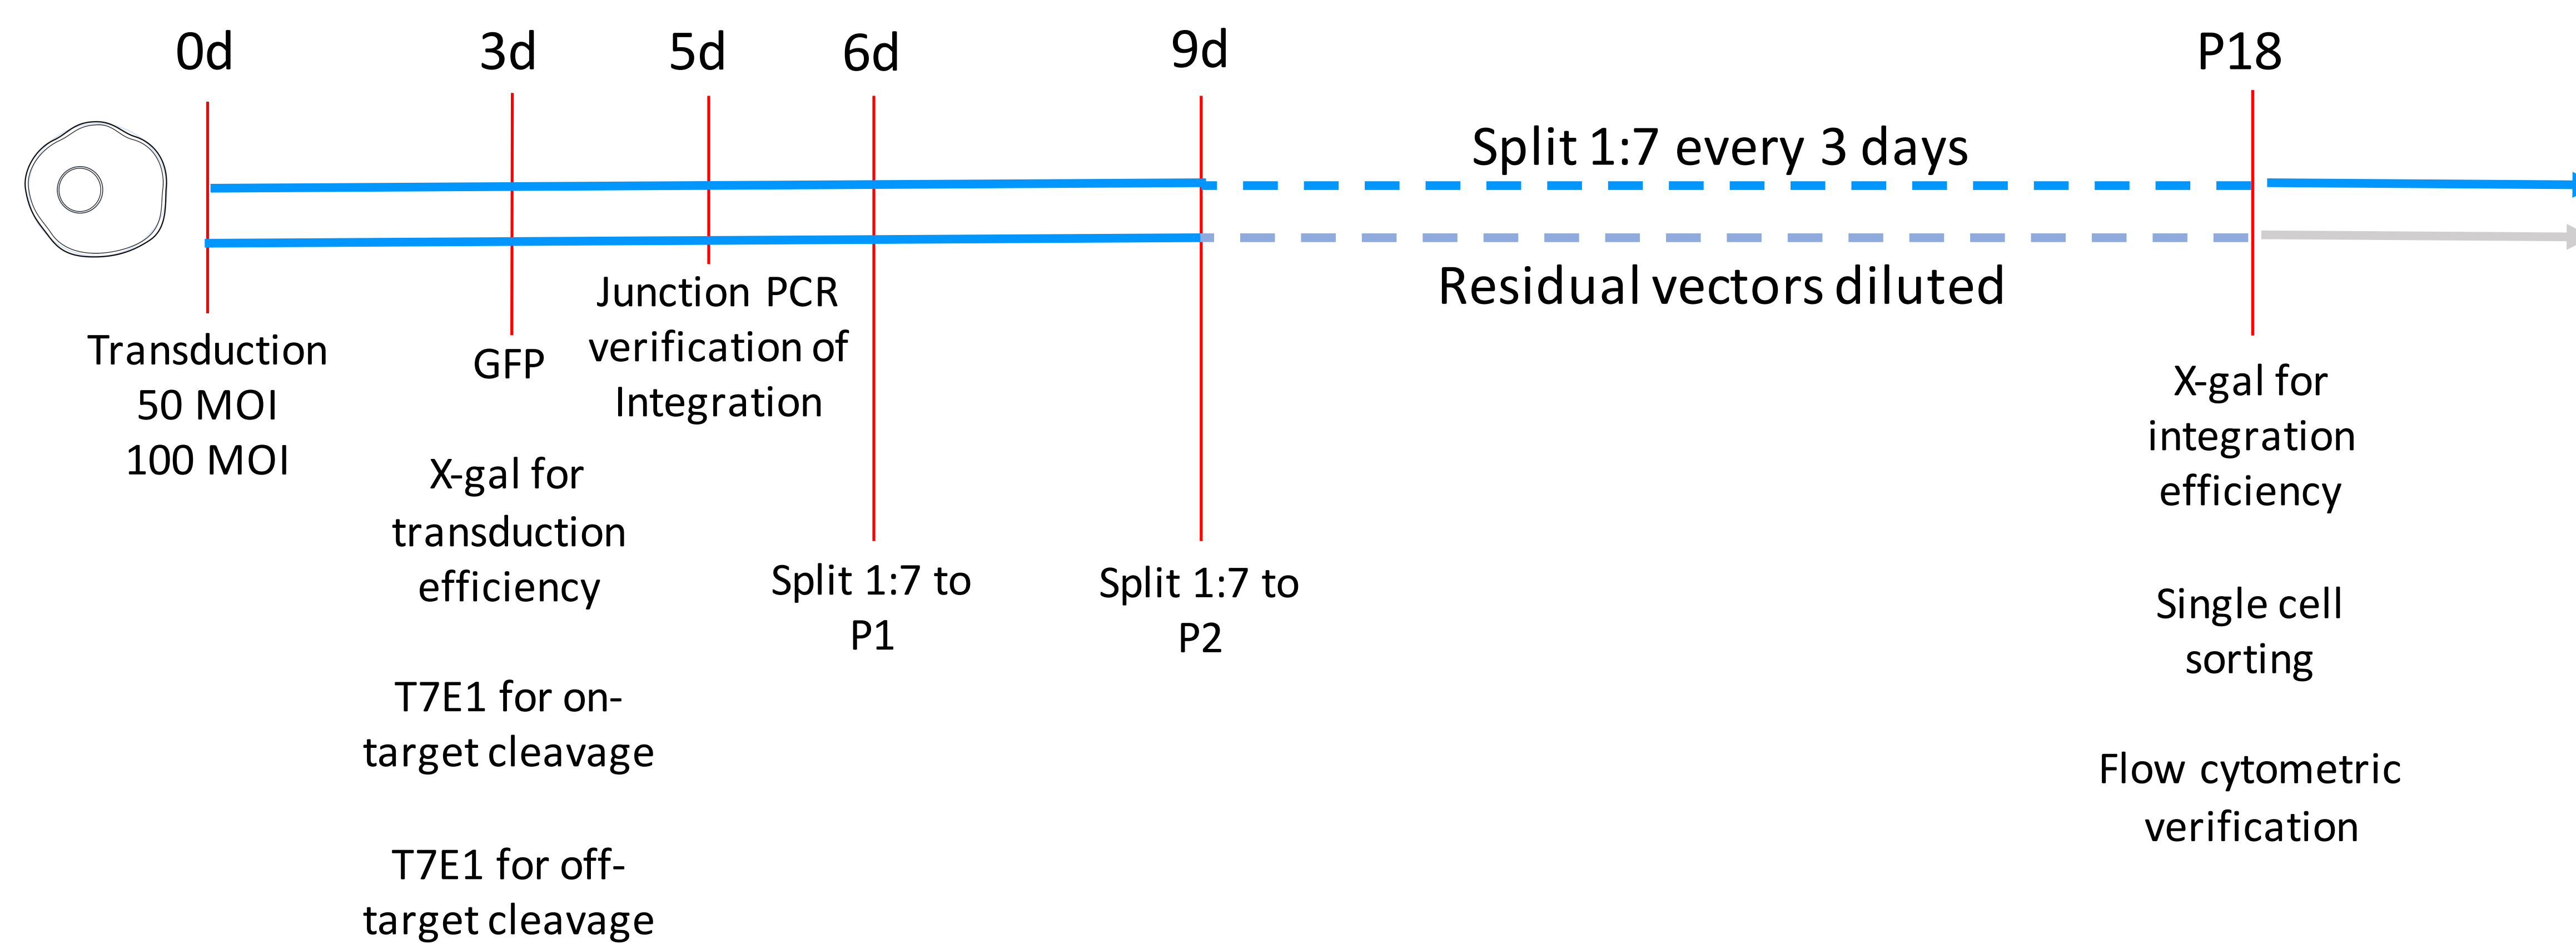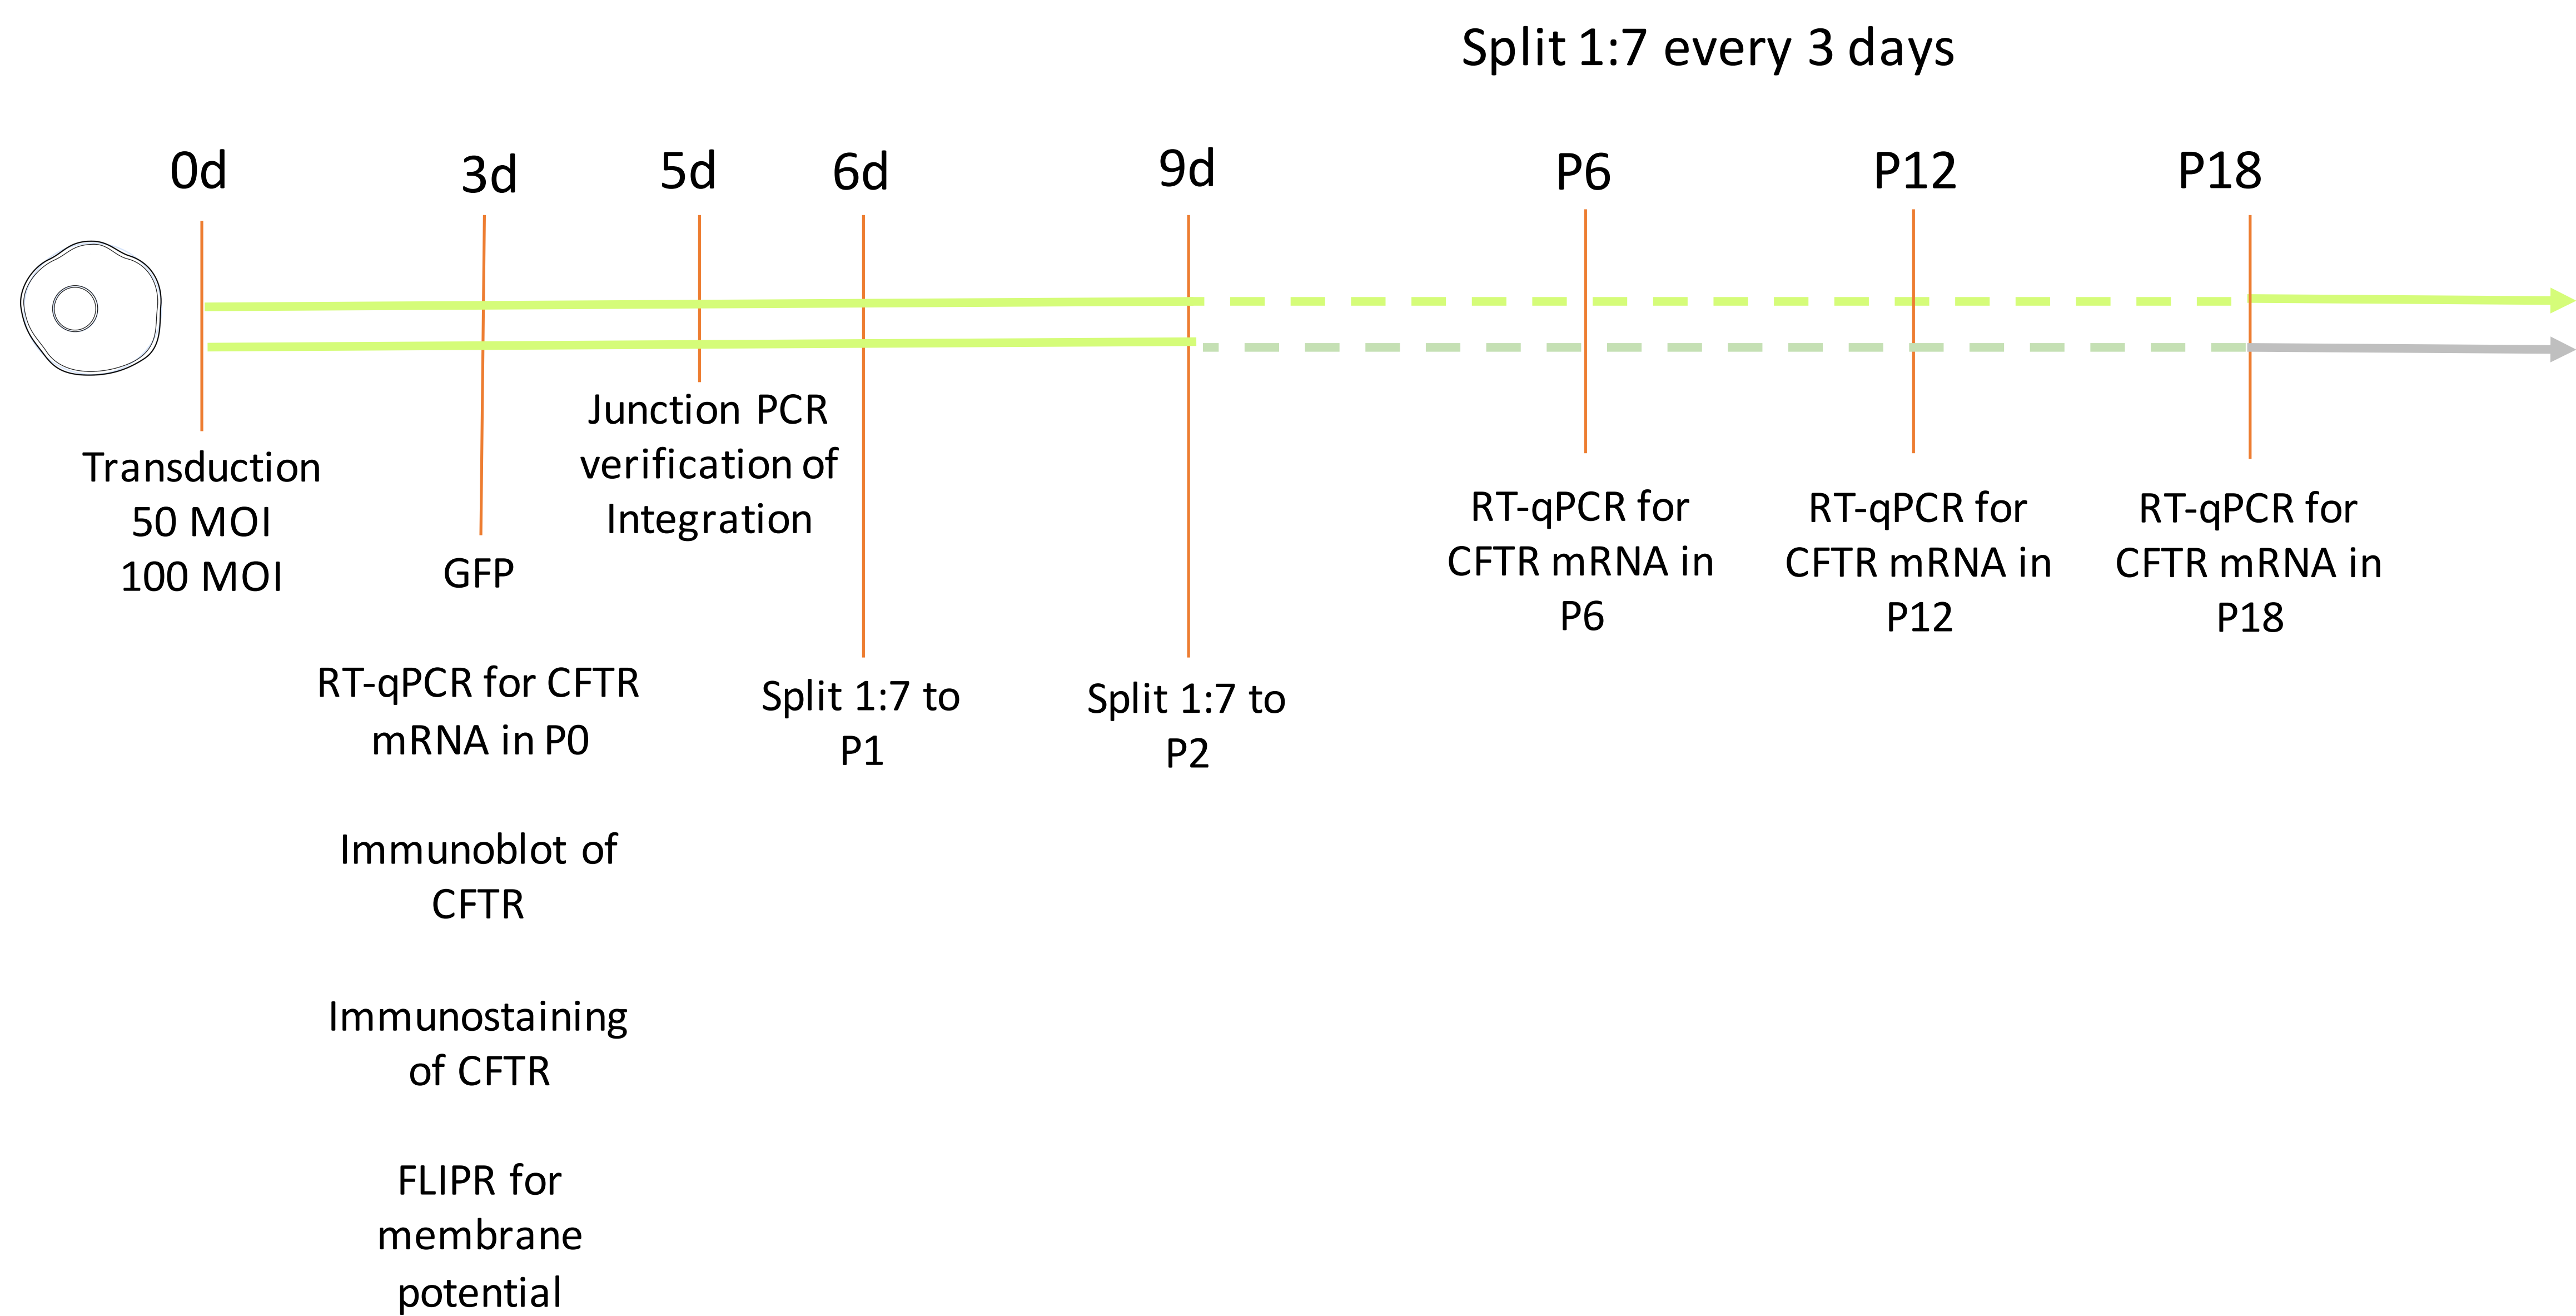

**Supplementary Figure 2.** Schematic diagram of experimental designs and time courses for data collection.



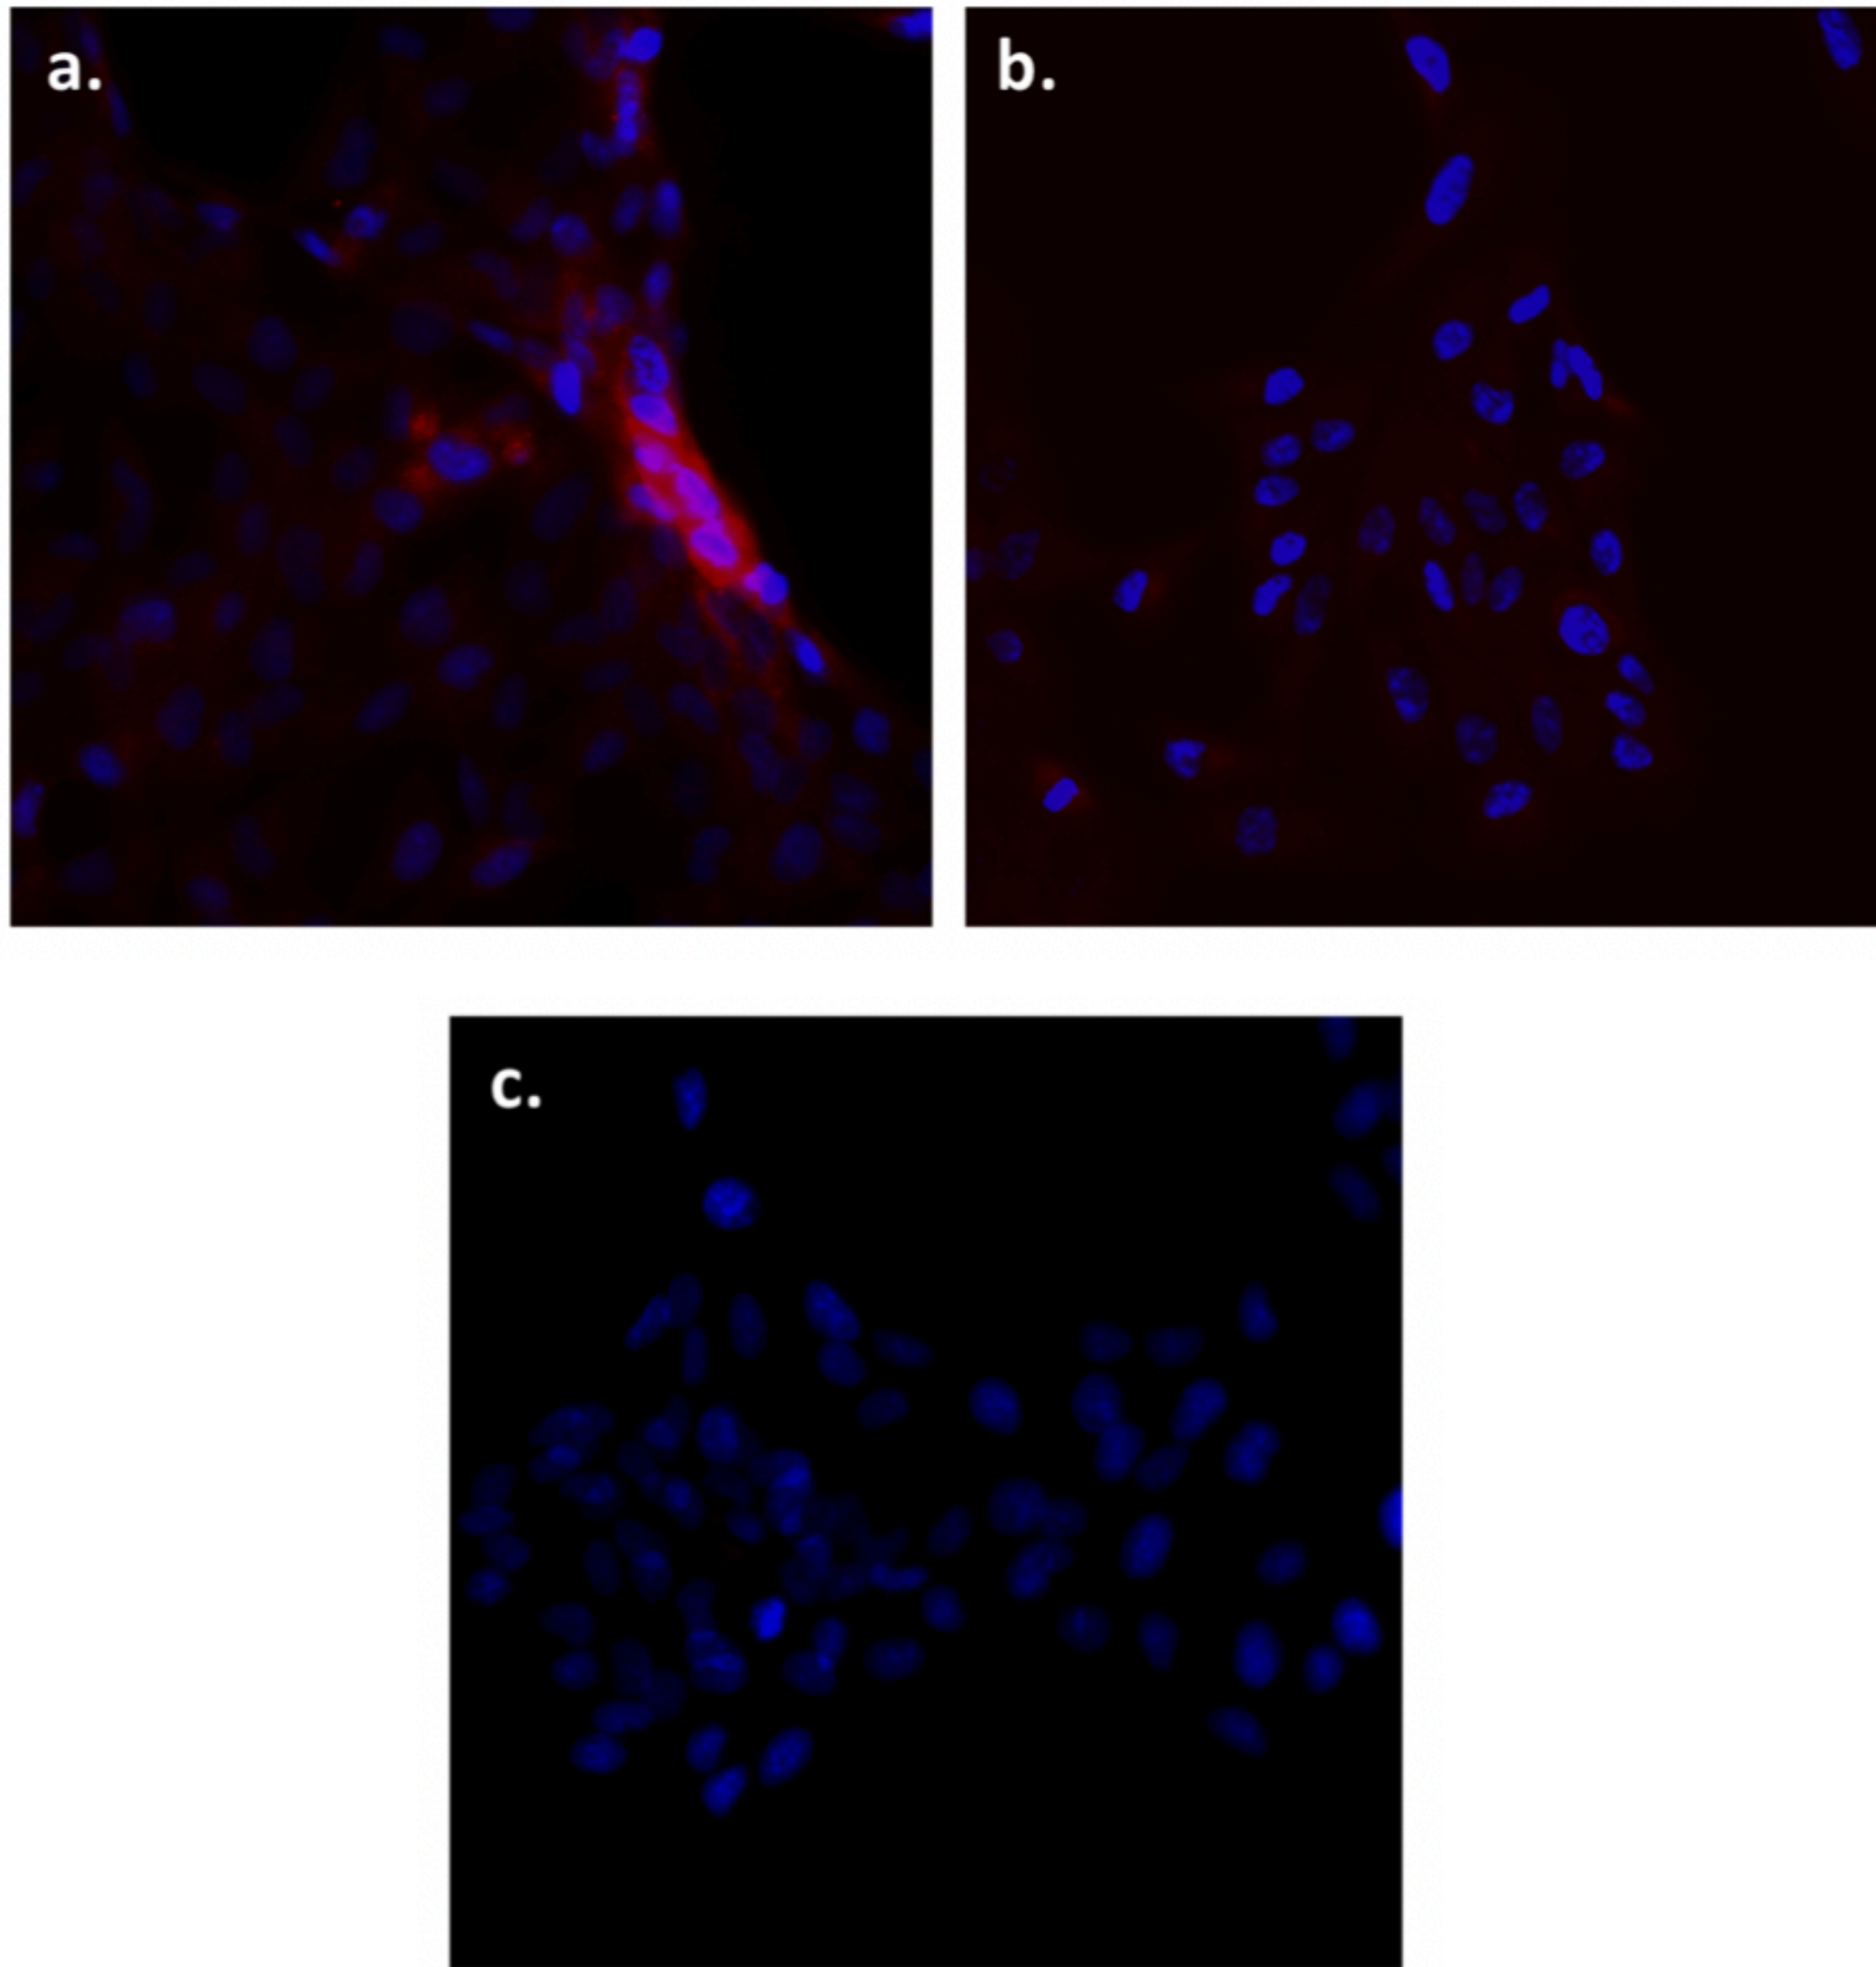

**Supplementary Figure 3.** Immunodetection of human CFTR expression. A. Immunofluorescent staining for CFTR (red) in IB3-1 cells transduced with 100MOI of HD-Ad-K18CFTR vector and cultured for 3 days. B. Immunofluorescent staining for untransduced IB3-1 cells. C. No- antibody control. Cell nuclei were labeled using DAPI.



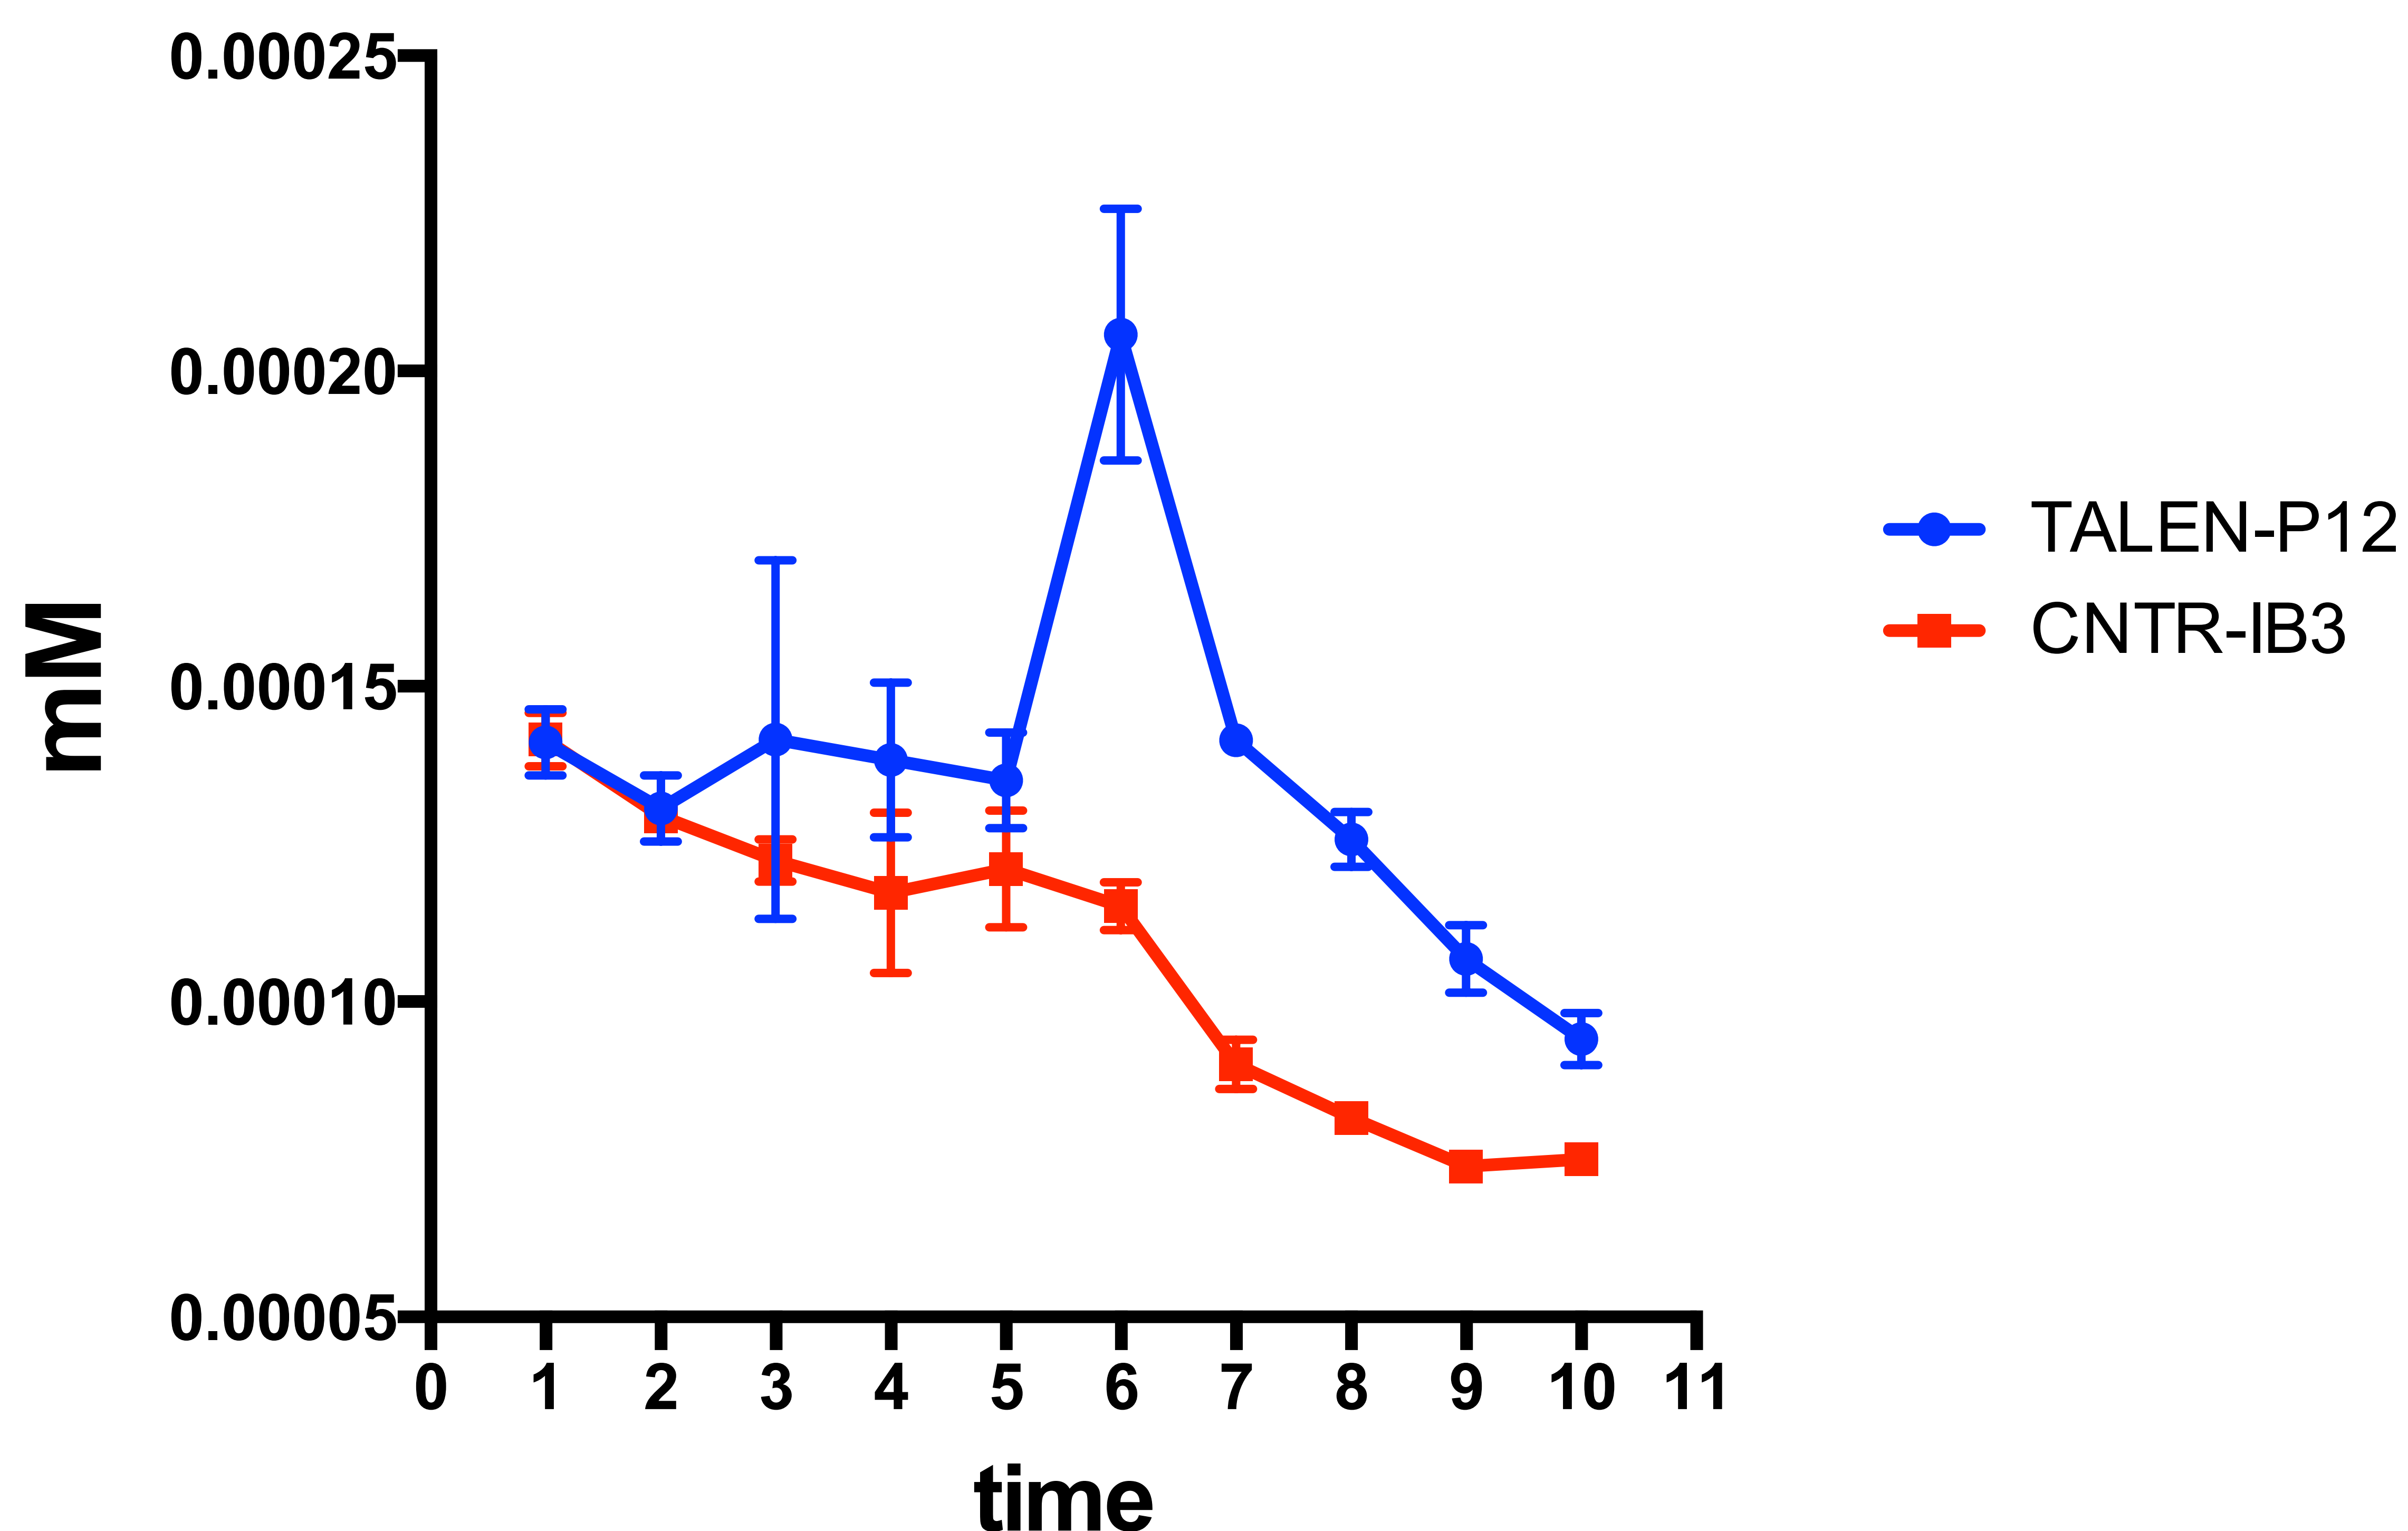

**Supplementary Figure 4.** Iodide efflux assay for IB3-1 cells transduced with HD-Ad-K18CFTR- TALEN vector and passed for 12 generations. CNTR-IB3, cells without transduction. For iodide efflux assay, IB3-1 cells were seeded in 6 well plates and incubated for 1 hour in iodide loading buffer (135 mMNaI, 4 mM KNO<sub>3</sub>, 2 mM Ca(NO<sub>3</sub>).4H<sub>2</sub>O, 2 mM Mg(NO<sub>3</sub>).6H<sub>2</sub>O, 11 mM Glucose, 20 mM HEPES). Iodide efflux was started by adding forskolin (40uM) and measured at 1 min intervals using an iodide sensitive electrode (thermoFisher, waltham, MA).

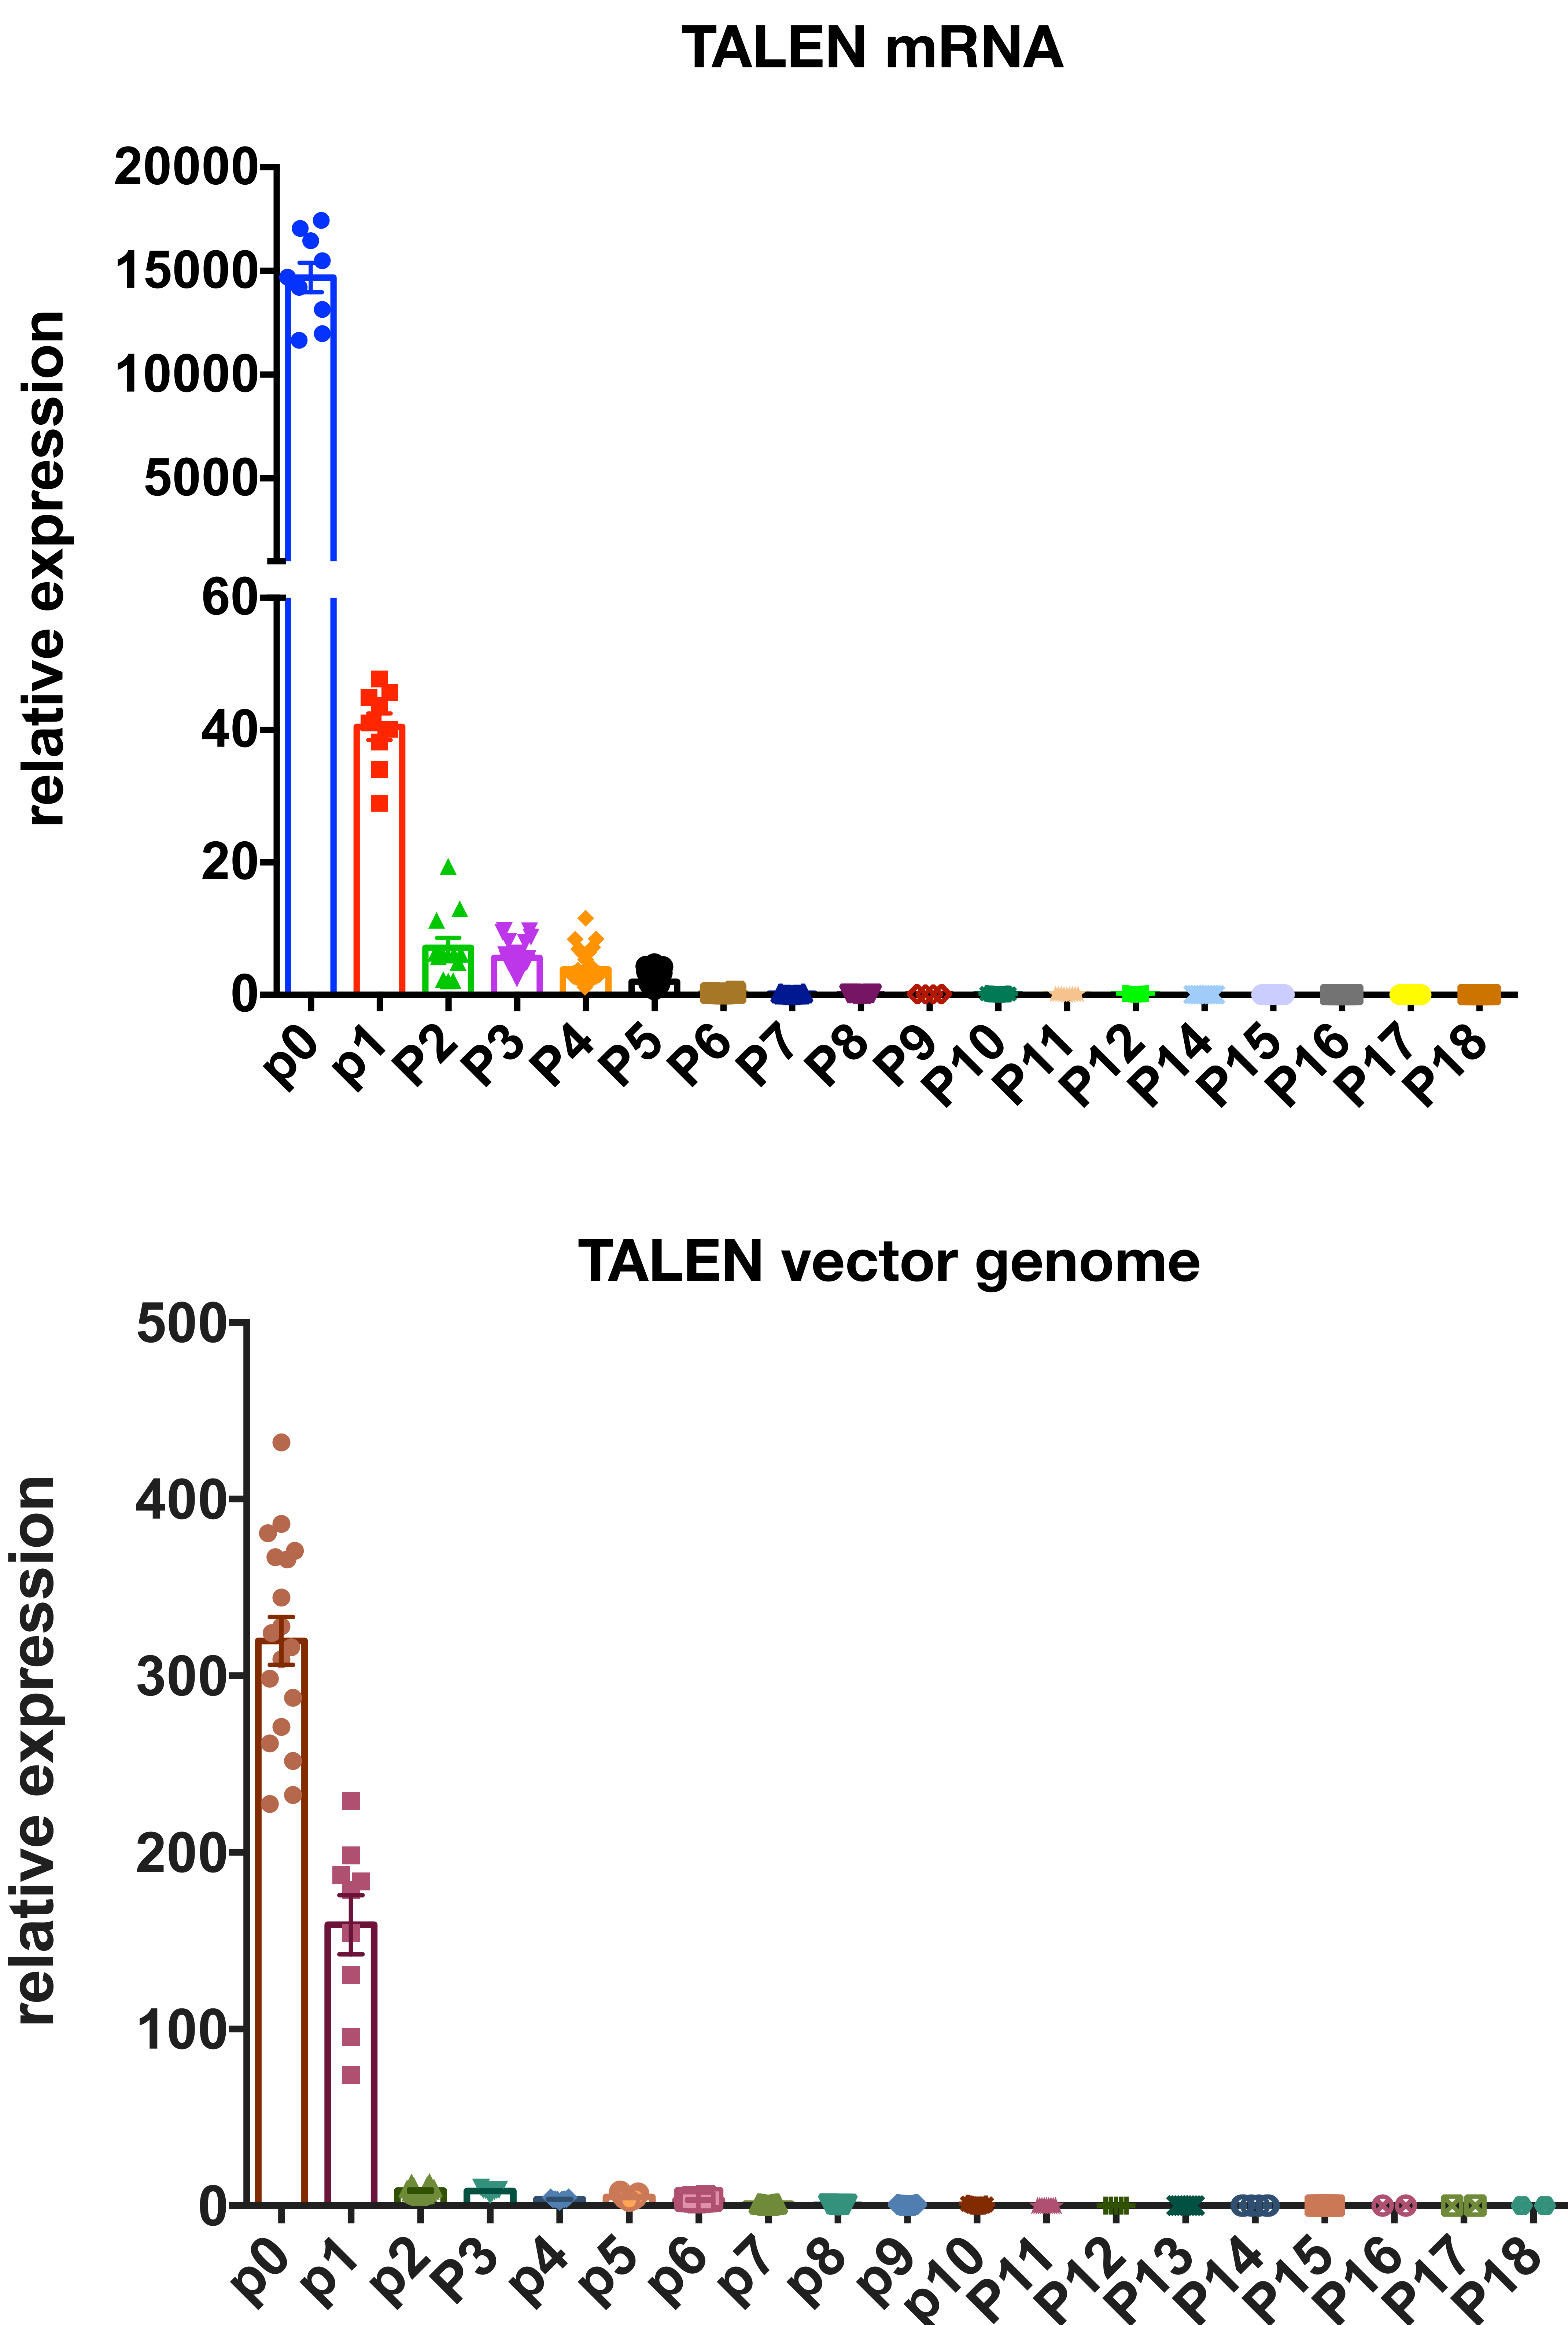

**Supplementary Figure 5.** Top, qPCR analysis for TALEN mRNA level at each passage for 18 passages. IB3-1 cells transduced with 100MOI of HD-Ad-K18CFTR-TALEN were passaged at an 1:7 ratio for 10 generations, for each passage, total RNA was extracted from  $1 \times 10^6$  cells for
